# Supplementary material
Source: Springer Nature journal article supplement (https://www.springermedizin.de/resource/supplementary/12877_2013_945_MOESM3_ESM.pdf/9440828)

**A chart to show potential delays in the Haringey Memory Service patient pathway**

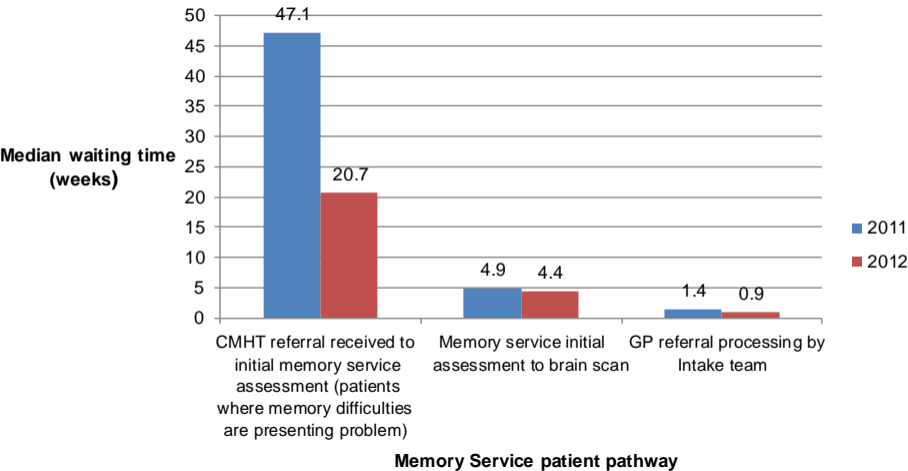

Supplement: MOESM3 [file 9440828]
